# Supplementary material
Source: HighWire-hosted journal article supplement (https://erj.ersjournals.com/content/55/6/2001822)
Supplement: inline-supplementary-material-1 [file inline-supplementary-material-1.pdf]

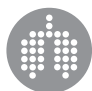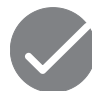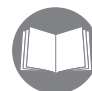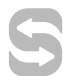

SHAREABLE PDF

# COVID-19 and pulmonary rehabilitation: preparing for phase three

Massimiliano Polastri <sup>1</sup>, Stefano Nava<sup>2,3</sup>, Enrico Clini <sup>4</sup>, Michele Vitacca <sup>5</sup> and Rik Gosselink <sup>6,7</sup>

**Affiliations:** <sup>1</sup>Medical Dept of Continuity of Care and Disability, Physical Medicine and Rehabilitation, St Orsola University Hospital, Bologna, Italy. <sup>2</sup>Dept of Clinical, Integrated and Experimental Medicine (DIMES), University of Bologna, Bologna, Italy. <sup>3</sup>Respiratory and Critical Care Unit, St Orsola University Hospital, Bologna, Italy. <sup>4</sup>University Hospital of Modena Policlinico, Respiratory Diseases Unit, Dept of Medical and Surgical Sciences SMECHIMAL, University of Modena Reggio-Emilia, Modena, Italy. <sup>5</sup>Respiratory Rehabilitation Dept, Istituti Clinici Scientifici Maugeri IRCCS, Pavia, Italy. <sup>6</sup>Dept of Critical Care, University Hospital Leuven, Leuven, Belgium. <sup>7</sup>Dept of Rehabilitation Sciences, KU Leuven, Leuven, Belgium.

**Correspondence:** Massimiliano Polastri, Medical Dept of Continuity Care and Disability, Physical Medicine and Rehabilitation, St Orsola University Hospital, Via G. Massarenti 9, Bologna 40138, Italy. E-mail: gbptap1@gmail.com

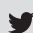

@ERSpublications

**Considering the expected high burden of respiratory, physical and psychological impairment following the acute phase of COVID-19, a huge number of patients should be referred early to a rehabilitation programme** <https://bit.ly/3d0s0hu>

**Cite this article as:** Polastri M, Nava S, Clini E, *et al.* COVID-19 and pulmonary rehabilitation: preparing for phase three. *Eur Respir J* 2020; 55: 2001822 [<https://doi.org/10.1183/13993003.01822-2020>].

This single-page version can be shared freely online.

As of 15 May 2020, 4405680 coronavirus 2019 (COVID-19) cases have been reported worldwide [1]. Although figures are increasing, it seems the virus aggression is lowering, significantly reducing the pressure on the intensive care unit (ICU) beds. At the time of writing, the lockdown is going through a new phase of remodelling, and the National Authorities are testing the possibility of resuming economic activities. From the general population point of view, this is an encouraging aspect but, all those professionals involved in the pathway of care are aware of the importance this phase has on preventing the spread of the infection.
